# Supplementary material for: Stromal Infiltration of Tumor-Associated Macrophages Conferring Poor Prognosis of Patients with Basal-Like Breast Carcinoma
Source: PubMed Central journal article supplement — J Cancer. 2018 Jun 6;9(13):2308–16. doi: 10.7150/jca.25155 (PMC6036715; doi:10.7150/jca.25155), 2018-06-06
Supplement: jcav09p2308s1.pdf [file jcav09p2308s1.pdf]

**Supplementary Table 1. Multivariate Cox regression analyses for RFS and OS of BLBC**

| Variables*                              | OS    |             |              | RFS   |             |                  |
|-----------------------------------------|-------|-------------|--------------|-------|-------------|------------------|
|                                         | HR    | 95% CI      | P            | HR    | 95% CI      | P                |
| <b>Continuous variable</b>              |       |             |              |       |             |                  |
| CD68 <sup>+</sup> in TS                 | 1.088 | 0.999-1.186 | 0.053        | 1.054 | 0.977-1.057 | 0.419            |
| CD163 <sup>+</sup> in TS                | 1.447 | 1.020-1.175 | <b>0.001</b> | 1.338 | 1.012-1.164 | <b>0.015</b>     |
| <b>One-quarter cutoff</b>               |       |             |              |       |             |                  |
| CD68 <sup>+</sup> in TS (low vs. high)  | 1.830 | 0.967-3.462 | 0.063        | 1.356 | 0.804-2.288 | 0.253            |
| CD163 <sup>+</sup> in TS (low vs. high) | 2.231 | 1.170-4.256 | <b>0.015</b> | 1.707 | 1.014-2.876 | <b>0.044</b>     |
| <b>Median cutoff</b>                    |       |             |              |       |             |                  |
| CD68 <sup>+</sup> in TS (low vs. high)  | 1.850 | 0.796-4.298 | 0.153        | 1.250 | 0.666-2.345 | 0.487            |
| CD163 <sup>+</sup> in TS (low vs. high) | 3.427 | 1.368-8.587 | <b>0.009</b> | 4.304 | 1.994-9.286 | <b>&lt;0.001</b> |

\*The multivariate analysis of CD68<sup>+</sup> and CD163<sup>+</sup> TAMs by each cutoff value was adjusted by age, tumor size, histological grade, lymph node status and radiotherapy;  
 BLBC, basal-like breast cancer; TS, tumor stroma; OS: overall survival; RFS: recurrence-free survival; HR: hazard ratio; CI: confidence interval.
